# Supplementary material for: Combining ABCG2 Inhibitors with IMMU-132, an Anti–Trop-2 Antibody Conjugate of SN-38, Overcomes Resistance to SN-38 in Breast and Gastric Cancers
Source: Oxford University Press journal article supplement (doi:10.1158/1535-7163.mct-16-0219), 2016-05-22
Supplement: 15357163mct160219-sup-164834_1_supp_3485332_m6x0mm.docx [file 15357163mct160219-sup-164834_1_supp_3485332_m6x0mm.docx]

Supplementary Table S1. Relative mRNA levels of ABCG2 determined by RT-qPCR.

|  | GAPDH | ABCG2 |  |  | Fold changeb |
| --- | --- | --- | --- | --- | --- |
|  | Ct | Ct | -ΔCta | 2-ΔCt |  |
| NCI-N87 | 18.22 | 28.05 |  |  |  |
|  | 17.86 | 27.74 |  |  |  |
| (mean) | 18.04 | 27.90 | -9.86 | 0.001076 | 1 |
|  |  |  |  |  |  |
| NCI-N87-S120 | 16.82 | 19.71 |  |  |  |
|  | 16.94 | 19.55 |  |  |  |
| (mean) | 16.88 | 19.63 | -2.48 | 0.179244 | 167 |
|  |  |  |  |  |  |
| MDA-MB-231 | 17.02 | 31.99 |  |  |  |
|  | 17.11 | 31.74 |  |  |  |
| (mean) | 17.07 | 31.87 | -14.8 | 0.000035 | 1 |
|  |  |  |  |  |  |
| MDA-MB-231-S120 | 20.75 | 21.01 |  |  |  |
|  | 21.01 | 20.86 |  |  |  |
| (mean) | 20.88 | 20.94 | 0.06 | 0.959264 | 27,408 |

aΔCt = Mean of Ct[ABCG2] – Mean of Ct[GAPDH]

bFold change = (2-ΔCt of S120) divided by (2-ΔCt of parent)
