# Supplementary material for: Combining ABCG2 Inhibitors with IMMU-132, an Anti–Trop-2 Antibody Conjugate of SN-38, Overcomes Resistance to SN-38 in Breast and Gastric Cancers
Source: Oxford University Press journal article supplement (doi:10.1158/1535-7163.mct-16-0219), 2016-05-22
Supplement: 15357163mct160219-sup-164834_1_supp_3485333_s6x0p8.docx [file 15357163mct160219-sup-164834_1_supp_3485333_s6x0p8.docx]

Supplementary Table S2. Functional activity of ABCB1 shown for HCT15, but not for NCI-N87 or NCI-N87-S120.

|  | ABCB1 | T (°C) | Rhodamine 123 | Verapamil | MFI |
| --- | --- | --- | --- | --- | --- |
| HCT15 | + | 37 | - | - | 3 |
|  |  | 4 | + | - | 704 |
|  |  | 37 | + | - | 28 |
|  |  | 37 | + | + | 1451 |
|  |  |  |  |  |  |
| NCI-N87 | - | 37 | - | - | 4 |
|  |  | 4 | + | - | 253 |
|  |  | 37 | + | - | 217 |
|  |  | 37 | + | + | 186 |
|  |  |  |  |  |  |
| NCI-N87-S120 | - | 37 | - | - | 1 |
|  |  | 4 | + | - | 969 |
|  |  | 37 | + | - | 852 |
|  |  | 37 | + | + | 871 |
